# Supplementary material
Source: PubMed Central journal article supplement (PMC5686551)
Supplement: EMBJ-36-3372-s004.pdf [file EMBJ-36-3372-s004.pdf]

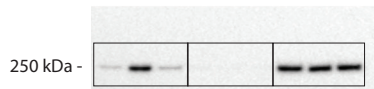

Figure 2B - CHD1

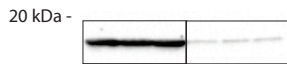

Figure 2B - H3

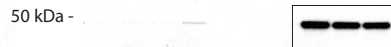

Figure 2B - Tubulin

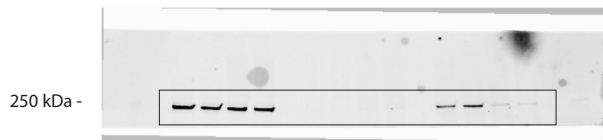

Figure 2D - CHD1

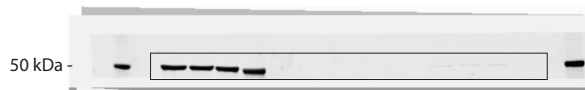

Figure 2D - Tubulin

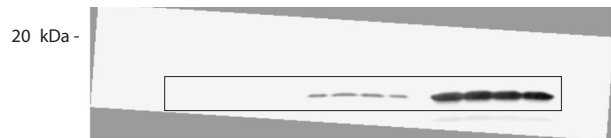

Figure 2D - H3

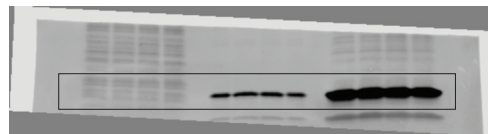

Figure 2D - H3 (long exposure)
