# Supplementary material
Source: PubMed Central journal article supplement (PMC5686551)
Supplement: EMBJ-36-3372-s006.pdf [file EMBJ-36-3372-s006.pdf]

250 kDa -

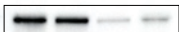

Figure 4A - CHD1

50 kDa -  
37 kDa -

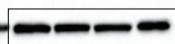

Figure 4A - Tubulin

50 kDa -  
37 kDa -

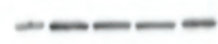

Figure 4A - Tubulin (short exposure)

100 kDa -  
75 kDa -

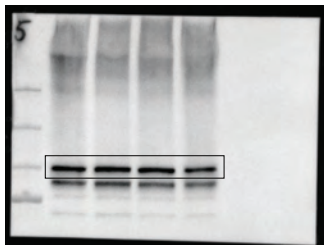

Figure 4A - XPB

37 kDa -

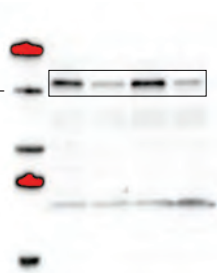

Figure 4A - DDB2

250 kDa -

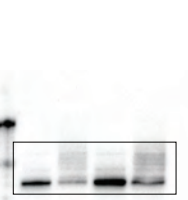

Figure 4A - XPC
