# Supplementary material
Source: PubMed Central journal article supplement (PMC5686551)

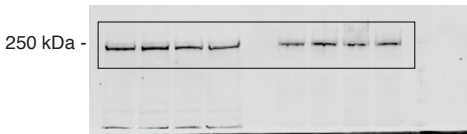

Figure 1A - CHD1

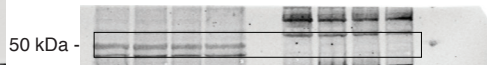

Figure 1A - Tubulin

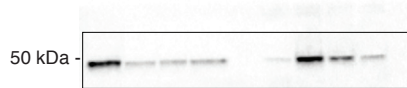

Figure 1A - DDB2

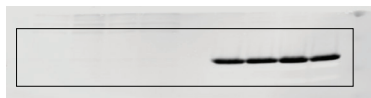

Figure 1A - H3

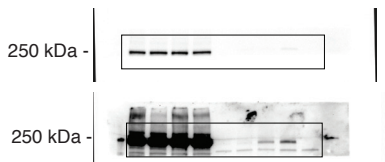

Figure 1B - CHD1

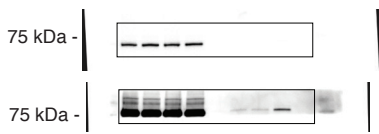

Figure 1B - XPD

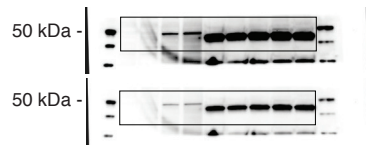

Figure 1B - DDB2-FLAG

Supplement: EMBJ-36-3372-s003.pdf [file EMBJ-36-3372-s003.pdf]

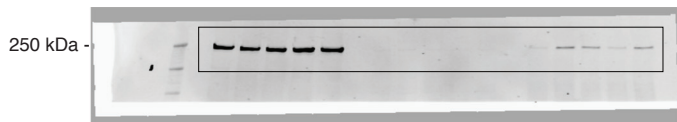

Figure 3A - CHD1

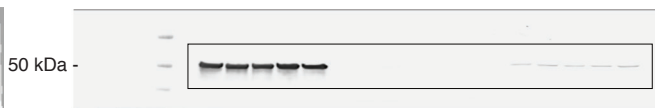

Figure 3A - Tubulin

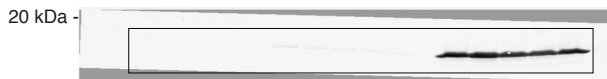

Figure 3A - H3

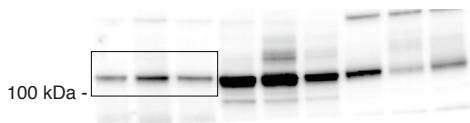

Figure 3B - XPC

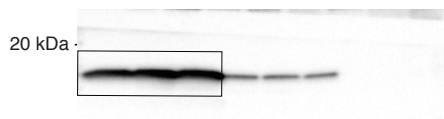

Figure 3B - H3

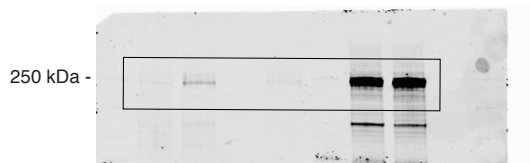

Figure 3C - CHD1

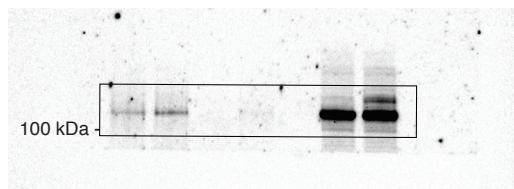

Figure 3C - XPC

Supplement: EMBJ-36-3372-s005.pdf [file EMBJ-36-3372-s005.pdf]
